# Supplementary material
Source: Springer Nature journal article supplement (https://www.springermedizin.de/resource/supplementary/12865_2008_239_MOESM3_ESM.pdf/9427574)

**A**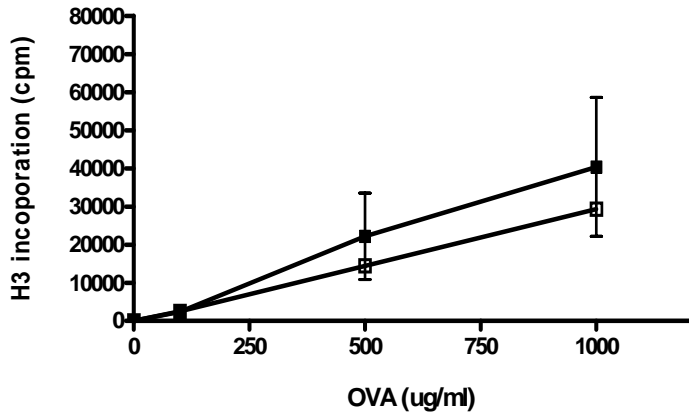

—□— Wild type

—■— DPP-IV<sup>-/-</sup>**B**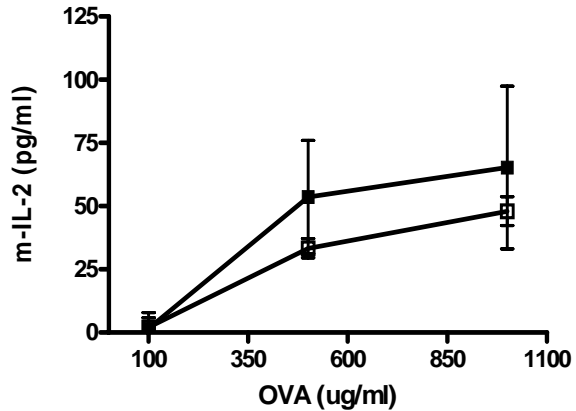

Supplement: MOESM3 [file 9427574]
